# Supplementary material for: Dakar Niño variability under global warming investigated by a high-resolution regionally coupled model
Source: Copernicus journal article supplement (doi:10.5194/egusphere-2023-2494), 2023-12-01
Supplement: Supplementary file 1 [file egusphere-2023-2494-supplement.pdf]

## Supplemental Informations

Here, we would like to add two supplemental figures for the submitted manuscript, Koseki et al.

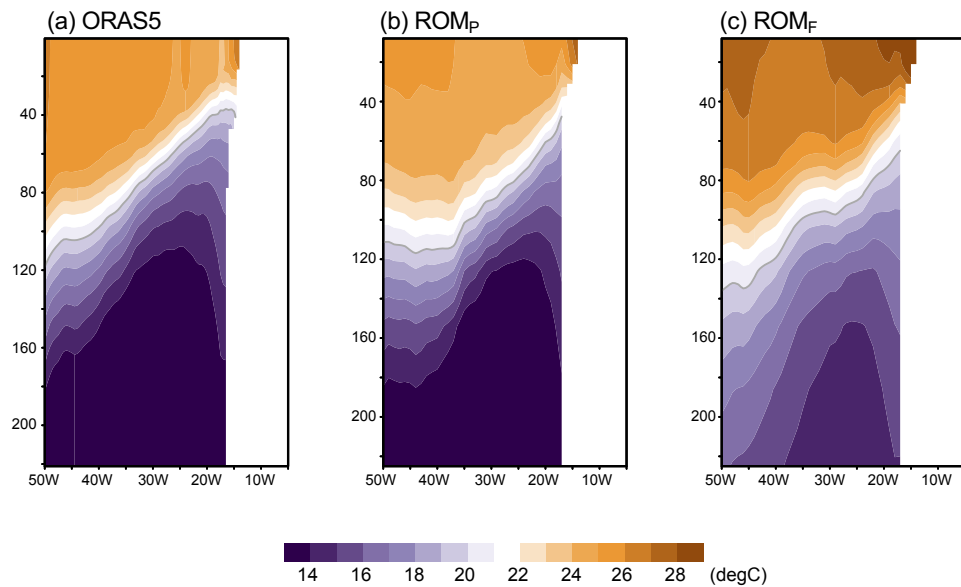

**Figure S1.**

Depth-longitude section of climatological ocean temperature in March averaged between 9°N and 12°N for (a) ORAS5 reanalysis and (b) ROM<sub>P</sub>, and (c) ROM<sub>F</sub>, respectively.

The gray contour denotes the ocean temperature of 20°C, a proxy for the thermocline depth.

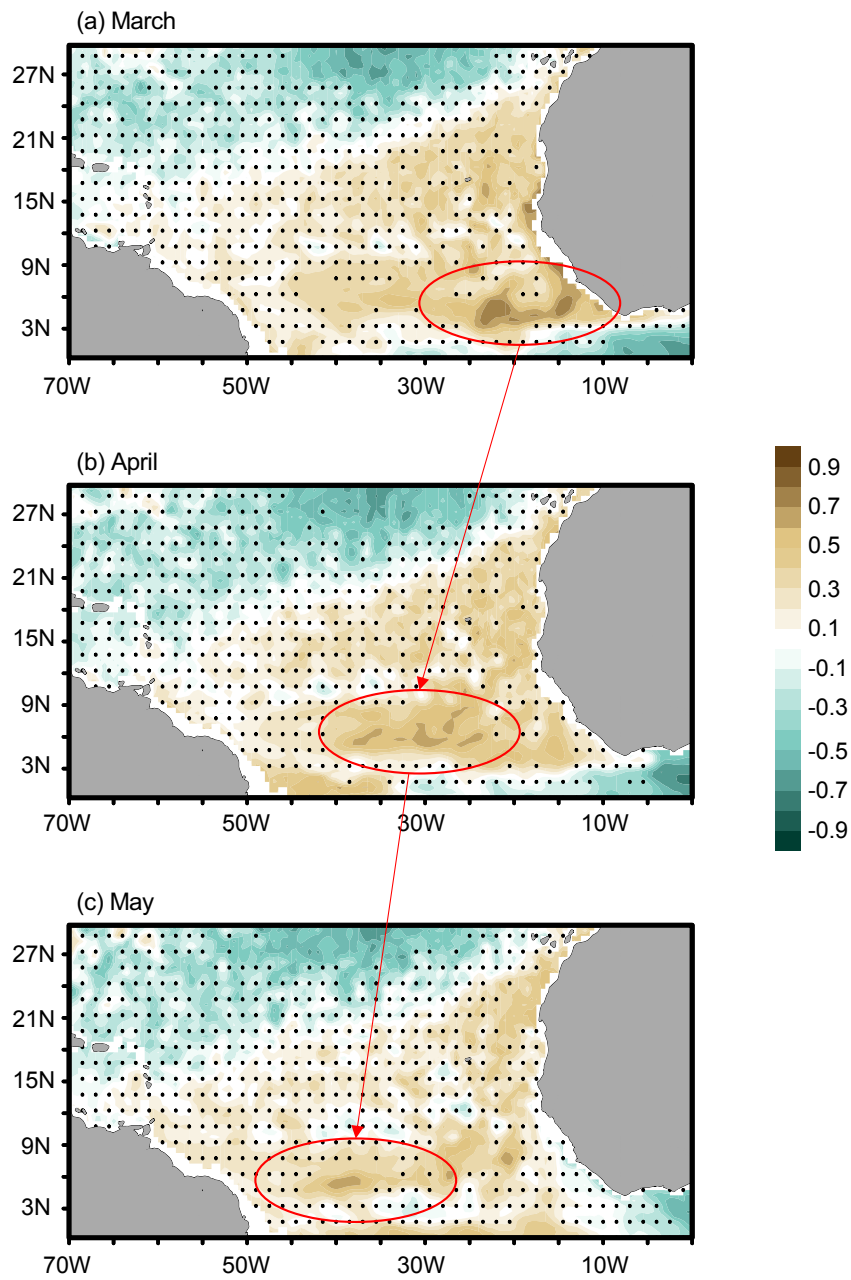

**Figure S2.**

Lag-correlation plots between March Dakar Index (SST over 9°N-14°N and 21°W-17°W) and ocean temperature at 41m depth in ROM<sub>p</sub> from March to May. Dots denote no significance of correlation. The red circle and arrow are the highest correlation and indication of westward propagation by eye.
